# Supplementary material for: Comparison of EUS-guided conventional smear and liquid-based cytology in pancreatic lesions: A systematic review and meta-analysis
Source: PubMed Central journal article supplement — Endosc Int Open. 2020 Oct 22;8(11):E1611–22. doi: 10.1055/a-1240-0027 (PMC7581473; doi:10.1055/a-1240-0027), 2020-10-22

## Supplementary material

### Comparison of EUS-guided conventional smear cytology and liquid based cytology in pancreatic lesions: A systematic review and meta-analysis

Saurabh Chandan MD1\*, Babu P. Mohan MD2\*, Shahab R. Khan MBBS3, Andrew Ofosu MD4, Amaninder S. Dhaliwal MBBS1, Aun R. Shah MD4, Neil Bhogal MD1, Harmeet S. Mashiana MBBS1, Simran Mashiana MBBS6, Lena L. Kassab MD MBA7, Suresh Ponnada MD8, Ishfaq Bhat MD1, Shailender Singh MD1, Antonio Facciorusso MD PhD9, Benjamin L. Witt MD10, Douglas G. Adler MD11

#### SUPPLEMENTARY MATERIALS:

APPENDIX-A: Literature Search Strategy

APPENDIX-B: MOOSE Check List

Table 1: Quality Assessment

Figure 1: PRISMA Flow Chart

Figures 2-6: Forest Plot, Pooled accuracy/sensitivity/specificity/PPV/NPV of techniques

## Supplementary material

### Appendix A Literature Search Strategy.

#### [ClinicalTrials.gov](https://www.clinicaltrials.gov)

fine-needle AND (liquid OR smear) | Pancreas Neoplasm

#### EBM Reviews:

((pancrea\* adj3 (mass\* or lesion\* or tumor\* or tumour\* or carcinoma\* or adenoma\* or neoplas\* or cancer\* or malignan\*)).ab,kf,kw,ti.) AND ((EUS-FNA or (endoscop\* adj5 (fine-needle or aspiration or biopsy))).ab,kf,kw,ti.) AND (("liquid\*".ab,kf,kw,ti.) OR ("smear\*".ab,kf,kw,ti.))

#### Embase (1974+)

((exp pancreas tumor/ or exp pancreas/ or exp pancreas disease/ or (pancrea\* adj3 (mass\* or lesion\* or tumor\* or tumour\* or carcinoma\* or adenoma\* or neoplas\* or cancer\* or malignan\*)).ab,kw,ti.) AND (exp fine needle aspiration biopsy/ or (EUS-FNA or (endoscop\* adj5 (fine-needle or aspiration or biopsy))).ab,kw,ti.) AND ((liquid\*.ab,kw,ti.) OR ("smear\*".ab,kw,ti.))) NOT (exp animal/ not exp human/, exp child/ not exp adult/, "case report".kw,pt,ti.) Limit to English

#### Ovid MEDLINE(R) 1946 to Present and Epub Ahead of Print, In-Process & Other Non-Indexed Citations and Ovid MEDLINE(R) Daily:

((exp Pancreatic Neoplasms/ or exp Pancreas/ or exp Pancreatic Diseases/ or (pancrea\* adj3 (mass\* or lesion\* or tumor\* or tumour\* or carcinoma\* or adenoma\* or neoplas\* or cancer\* or malignan\*)).ab,kf,ti.) AND (exp Biopsy, Fine-Needle/ OR (EUS-FNA or (endoscop\* adj5 (fine-needle or aspiration or biopsy))).ab,kf,ti.) AND ((liquid\*.ab,kf,ti.) OR ("smear\*".ab,kf,ti.))) NOT (exp Animals/ not Humans/, exp CHILD/ not exp ADULT/, "case report".kf,pt,ti.) Limit to English

#### Scopus:

( TITLE-ABS-KEY ( pancrea\* W/3 ( mass\* OR lesion\* OR tumor\* OR tumour\* OR carcinoma\* OR adenoma\* OR neoplas\* OR cancer\* OR malignan\* ) ) AND TITLE-ABS-KEY ( eus-fna OR ( endoscop\* W/5 ( fine-needle OR aspiration OR biopsy ) ) ) AND TITLE-ABS-KEY ( liquid\* OR smear\* ) ) AND ( LIMIT-TO ( LANGUAGE , "English" ) ) Limit to English

#### Web of Science:

TOPIC: (pancrea\* NEAR/3 (mass\* OR lesion\* OR tumor\* OR tumour\* OR carcinoma\* OR adenoma\* OR neoplas\* OR cancer\* OR malignan\*)) AND TOPIC: (EUS-FNA OR (endoscop\* NEAR/5 (fine-needle OR aspiration OR biopsy))) AND TOPIC: (liquid\* OR smear\*) Limit to English

## Supplementary material

**Appendix B** MOOSE checklist. From: Stroup DF, Berlin JA, Morton SC et al. for the Meta-analysis Of Observational Studies in Epidemiology (MOOSE) Group. Meta-analysis of Observational Studies in Epidemiology. A Proposal for Reporting. JAMA. 2000;283(15):2008-2012. doi: 10.1001/jama.283.15.2008

| Item No                                     | Recommendation                                                                          | Reported on page no |
|---------------------------------------------|-----------------------------------------------------------------------------------------|---------------------|
| Reporting of background should include      |                                                                                         |                     |
| 1                                           | Problem definition                                                                      | 6                   |
| 2                                           | Hypothesis statement                                                                    | 6                   |
| 3                                           | Description of study outcome(s)                                                         | 7                   |
| 4                                           | Type of exposure or intervention used                                                   | 6                   |
| 5                                           | Type of study designs used                                                              | 7                   |
| 6                                           | Study population                                                                        | 7                   |
| Reporting of search strategy should include |                                                                                         |                     |
| 7                                           | Qualifications of searchers (eg, librarians and investigators)                          | 7                   |
| 8                                           | Search strategy, including time period included in the synthesis and key words          | 7                   |
| 9                                           | Effort to include all available studies, including contact with authors                 | 7                   |
| 10                                          | Databases and registries searched                                                       | 7                   |
| 11                                          | Search software used, name and version, including special features used (eg, explosion) | 7-8                 |
| 12                                          | Use of hand searching (eg, reference lists of obtained articles)                        | 7                   |
| 13                                          | List of citations located and those excluded, including justification                   | 8,<br>Suppl Fig. 1  |
| 14                                          | Method of addressing articles published in languages other than English                 | -                   |
| 15                                          | Method of handling abstracts and unpublished studies                                    | 8                   |
| 16                                          | Description of any contact with authors                                                 | 8                   |

## Supplementary material

### Reporting of methods should include

|    |                                                                                                                                                                                                                                                                              |                         |
|----|------------------------------------------------------------------------------------------------------------------------------------------------------------------------------------------------------------------------------------------------------------------------------|-------------------------|
| 17 | Description of relevance or appropriateness of studies assembled for assessing the hypothesis to be tested                                                                                                                                                                   | 7-8                     |
| 18 | Rationale for the selection and coding of data (eg, sound clinical principles or convenience)                                                                                                                                                                                | 8                       |
| 19 | Documentation of how data were classified and coded (eg, multiple raters, blinding and interrater reliability)                                                                                                                                                               | 7                       |
| 20 | Assessment of confounding (eg, comparability of cases and controls in studies where appropriate)                                                                                                                                                                             | 7                       |
| 21 | Assessment of study quality, including blinding of quality assessors, stratification or regression on possible predictors of study results                                                                                                                                   | 8                       |
| 22 | Assessment of heterogeneity                                                                                                                                                                                                                                                  | 8-9                     |
| 23 | Description of statistical methods (eg, complete description of fixed or random effects models, justification of whether the chosen models account for predictors of study results, dose-response models, or cumulative meta-analysis) in sufficient detail to be replicated | 8-9                     |
| 24 | Provision of appropriate tables and graphics                                                                                                                                                                                                                                 | Tables 1-3,<br>Fig. 1-6 |

### Reporting of results should include

|    |                                                                     |                            |
|----|---------------------------------------------------------------------|----------------------------|
| 25 | Graphic summarizing individual study estimates and overall estimate | Fig. 1-6 Suppl<br>Fig. 2-6 |
| 26 | Table giving descriptive information for each study included        | Table 1                    |
| 27 | Results of sensitivity testing (eg, subgroup analysis)              | 12-13                      |
| 28 | Indication of statistical uncertainty of findings                   | 13                         |

## Supplementary material

Supplementary Table 1 Quality assessment.

| Study           | Representativeness of the average adult in community     | Selection                                |                                                                                         | Comparability                |                                       | Outcome                      |                          |                                                                                            | Score<br>Max = 8 | Quality<br>High > 6,<br>medium 4 to 6,<br>low < 4 |
|-----------------|----------------------------------------------------------|------------------------------------------|-----------------------------------------------------------------------------------------|------------------------------|---------------------------------------|------------------------------|--------------------------|--------------------------------------------------------------------------------------------|------------------|---------------------------------------------------|
|                 |                                                          | Cohort size                              | Information on clinical outcomes                                                        | Outcome not present at start | Factors comparable between the groups | Adequate clinical assessment | Follow up time           | Adequacy of follow-up                                                                      |                  |                                                   |
|                 | Population based: 1; multi-center: 0.5; single-center: 0 | > 40 patients: 1; 39 to 20: 0.5; < 20: 0 | Information with clarity: 1; information derived from percentage value: 0.5; unclear: 0 | Not present: 1; present: 0   | Yes: 1; no: 0                         | Yes: 1; no: 0                | Yes: 1; not mentioned: 0 | All patients followed up: 1; > 50% followed up: 0.5; < 50% followed up or not mentioned: 0 |                  |                                                   |
| Chun, 2020      | 0                                                        | 1                                        | 1                                                                                       | 1                            | 1                                     | 1                            | 1                        | 1                                                                                          | 7                | High                                              |
| Zhou, 2020      | 0                                                        | 1                                        | 1                                                                                       | 1                            | 1                                     | 1                            | 1                        | 1                                                                                          | 7                | High                                              |
| Hashimoto, 2017 | 0                                                        | 1                                        | 1                                                                                       | 1                            | 1                                     | 1                            | 0                        | 0                                                                                          | 5                | Medium                                            |
| De luna, 2004   | 0                                                        | 1                                        | 1                                                                                       | 1                            | 1                                     | 1                            | 1                        | 1                                                                                          | 7                | High                                              |
| Lee, 2016       | 0                                                        | 1                                        | 1                                                                                       | 1                            | 1                                     | 1                            | 1                        | 1                                                                                          | 7                | High                                              |
| Qin, 2014       | 0                                                        | 1                                        | 1                                                                                       | 1                            | 1                                     | 1                            | 1                        | 1                                                                                          | 7                | High                                              |
| Lee, 2011       | 0                                                        | 1                                        | 1                                                                                       | 1                            | 1                                     | 1                            | 0                        | 0                                                                                          | 5                | Medium                                            |
| Van riet 2020   | 0.5                                                      | 1                                        | 1                                                                                       | 1                            | 1                                     | 1                            | 1                        | 1                                                                                          | 7.5              | High                                              |
| Yeon 2018       | 0                                                        | 1                                        | 1                                                                                       | 1                            | 1                                     | 1                            | 1                        | 1                                                                                          | 7                | High                                              |

## Supplementary material

**Supplementary Fig. 1** PRISMA Flowchart. From: Moher D, Liberati A, Tetzlaff J, Altman DG, The PRISMA Group (2009). Preferred Reporting Items for Systematic Reviews and Meta-Analyses: The PRISMA Statement. PLoS Med 6(7): e1000097. doi:10.1371/journal.pmed1000097

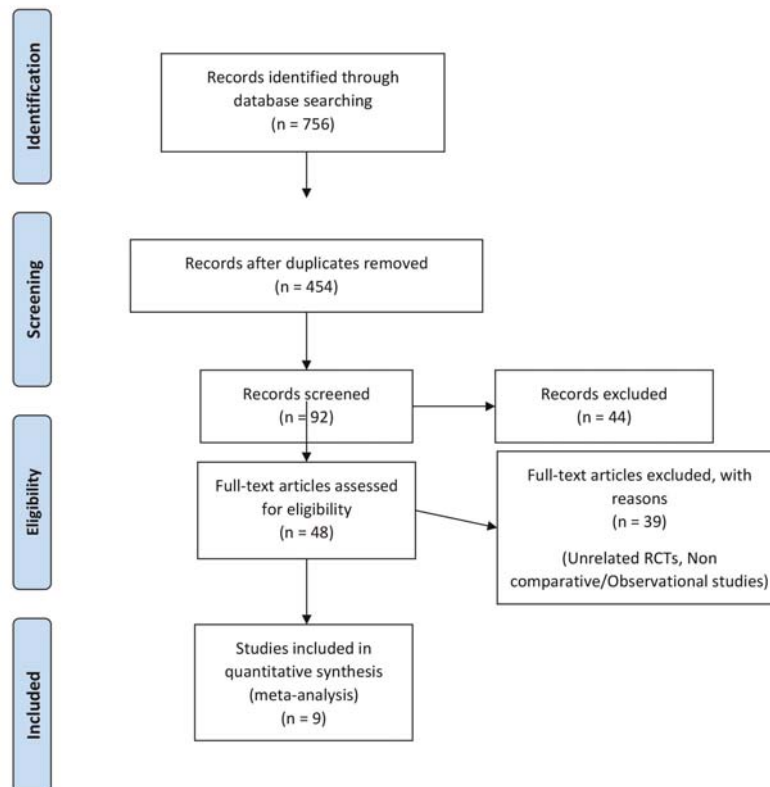

## Supplementary material

Supplementary Fig. 2 Accuracy.

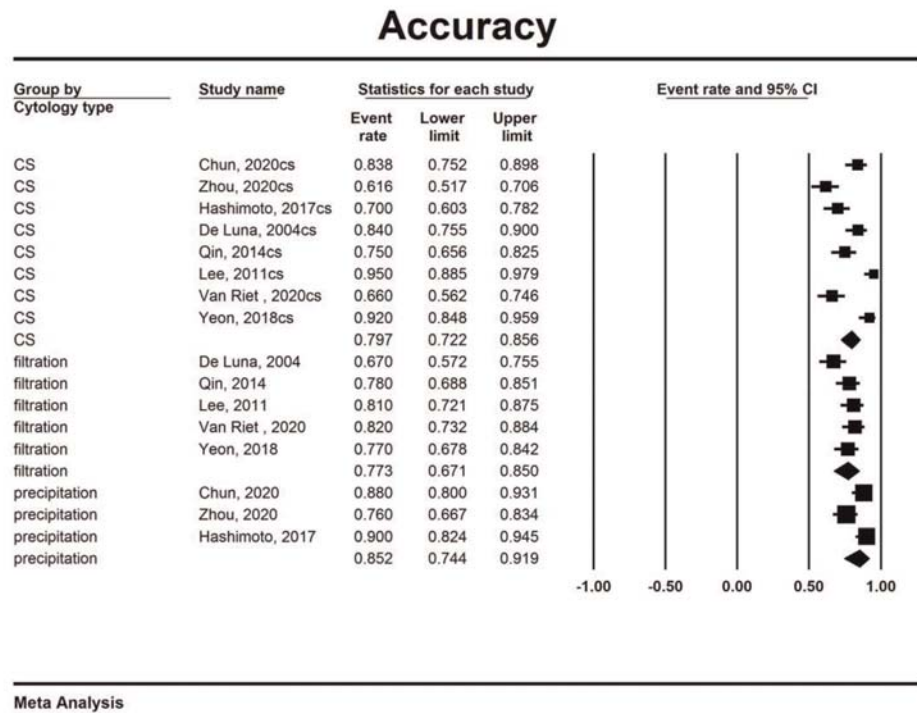

## Supplementary material

Supplementary Fig. 3 Sensitivity.

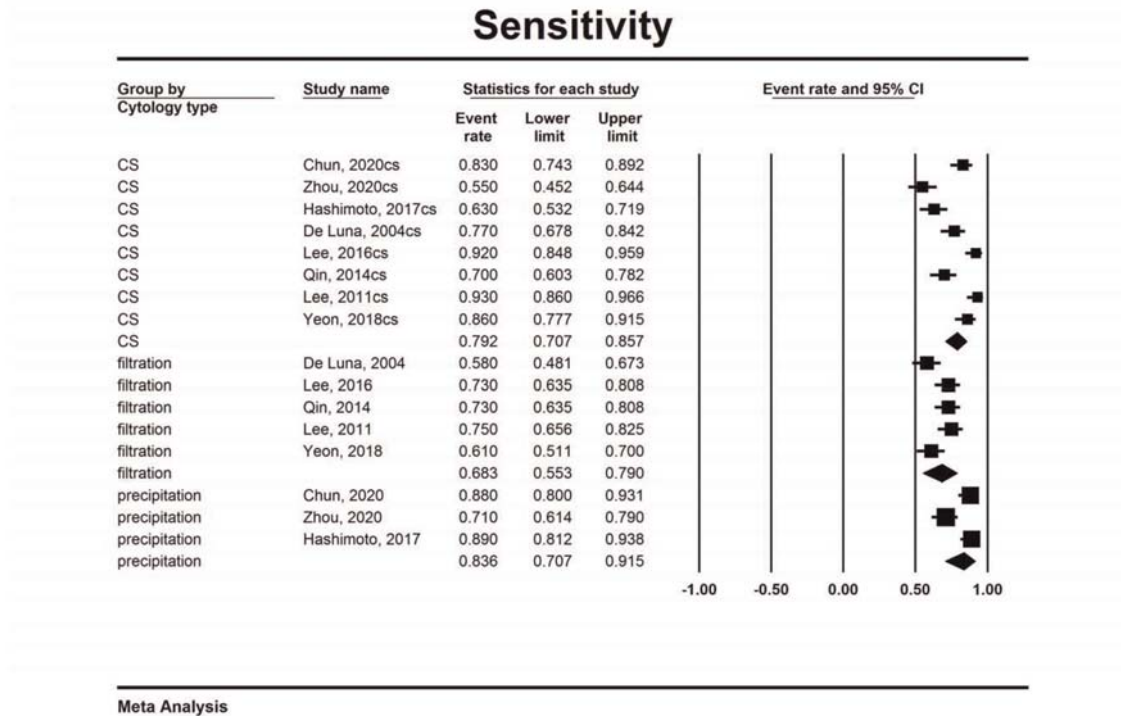



## Supplementary material

Supplementary Fig. 4 Specificity.

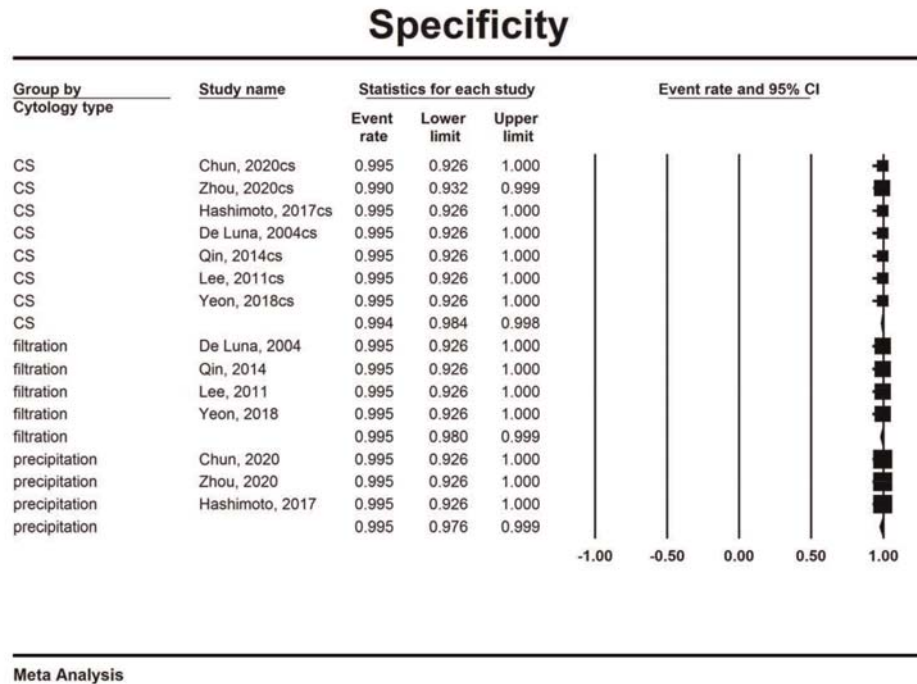

## Supplementary material

Supplementary Fig. 5 Positive predictive value.

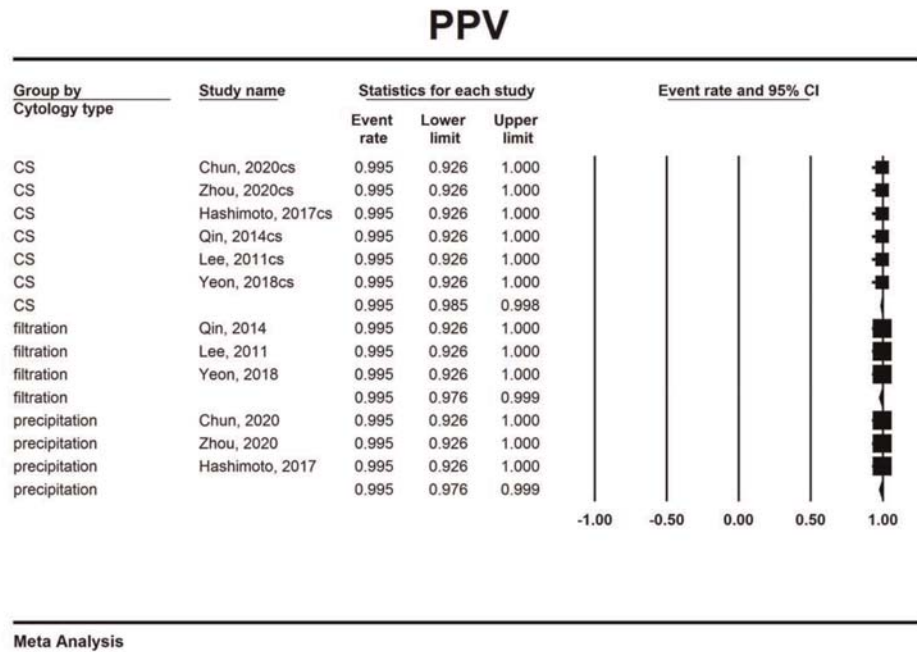

## Supplementary material

Supplementary Fig. 6 Negative predictive value

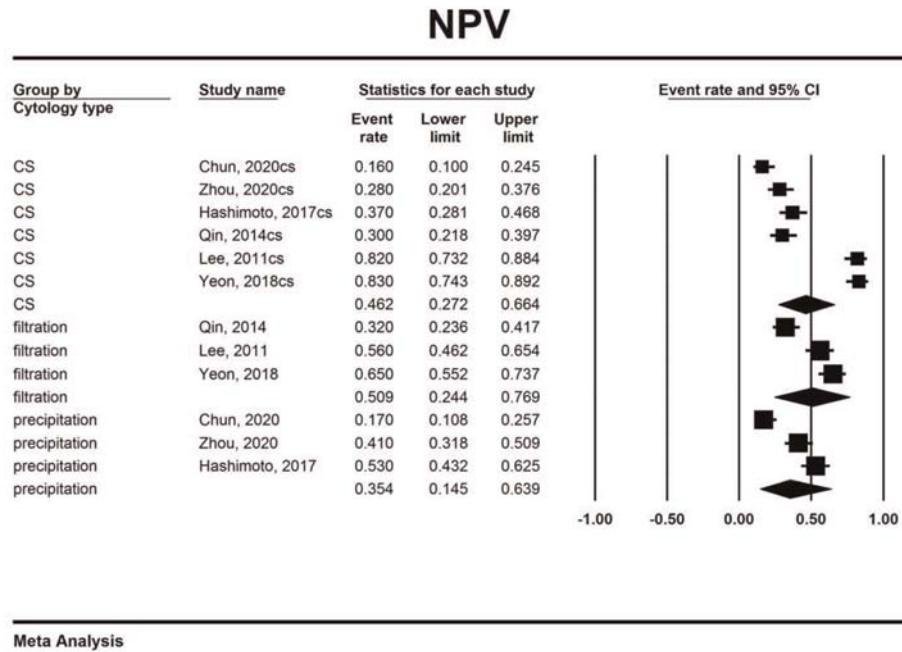

Supplement: 1935supmat_10-1055-a-1240-0027.pdf [file 1935supmat_10-1055-a-1240-0027.pdf]
